Title: UNSTABLE ANGINA - ARE PREOPERATIVE ISCHEMIC PHENOMENA PREDICTIVE FOR THE INTRAOPERATIVE COURSE?  
 Authors: H. Metzler, M.D., P. Rehak, Ph.D., H. Gombotz, M.D., W.F. List, M.D.  
 Affiliation: Department of Anesthesiology, University of Graz, Graz, Austria  
 Auenbruggerplatz, A - 8036 GRAZ-LKH

**Introduction.** Patients with unstable angina pectoris (UAP) exhibit a number of ischemic manifestations, including frequent and severe asymptomatic events. In the last year 3 anesthesiologic studies documented the high incidence of myocardial ischemia in the immediate preoperative phase (1,2,3). The question arises whether the severity of preoperative silent and symptomatic ischemic events correlates with the intraoperative course. Therefore this study was performed to document and compare pre- and intraoperative ischemic manifestations.

**Methods.** After informed consent 20 patients with UAP (mean age 60,8 yrs) scheduled for elective coronary artery bypass graft operation were studied. An ambulatory ECG-equipment (Diagnostic Medical Instruments, Syracuse, N.Y.) with a 2-channel recorder was applied over a period of exactly 24 hours preoperatively. Transient ischemic events were defined as pathologic-T, as ST-depression or ST-elevation of 0,1 mV or more lasting 2 minutes or more. Intraoperatively the period from induction of anesthesia until initiation of cardiopulmonary bypass was investigated. Monitoring included conventional ECG, leads I,II,III, aVR, aVL, aVF and V<sub>5</sub>, HR, AP, CVP, PCWP and CO. Based on a scoring system the severity of preoperative (ST↓ + ST↑ + pathologic-T + arrhythmias + symptomatic attacks) and intraoperative ischemic events (ST↓ + ST↑ + pathologic-T + LVEDP ↑ + arrhythmias) was classified as: 0=none, 1=mild, 2=moderate, 3=severe.

**Results.** The different ischemic manifestations are listed in table 1. 6 of 9 patients with ≥8 preoperative ischemic ST↓ events also exhibited intraoperative signs of ischemia. 2 of 12 patients with intraoperative myocardial ischemia did not show any ischemic phenomenon in the 24 h- preoperative phase. 1 patient with preoperative ST↑ also showed intraoperative signs of severe ischemia, 1 patient with LOWN IVb-arrhythmia also had severe arrhythmias during induction of anesthesia. Fig.1 shows the relationship between the scores of all pre- and intraoperative ischemic events. In fig.2 the total number of preoperative ST↓ (n/24 h, ▲) as well as the duration of preoperative ST↓ (min/24 h, ●) are scored versus all intraoperative ischemic events.

|          | Path. T | ST↓ | ST↑ | LOWN IV | Sympt. attack | LVEDP ↑ |
|----------|---------|-----|-----|---------|---------------|---------|
| Preop.   | 1       | 12  | 1   | 1       | 12            | -       |
| Intraop. | 3       | 5   | 3   | 1       | -             | 5       |

Table 1 Number of patients with different ischemic phenomena

**Discussion.** Previous cardiologic Holter studies have shown that only 20 % of transient ischemic events in patients with UAP are symptomatic and that ST-depression is by far (50%) the most frequent ischemic phenomenon, followed by ST-elevation (31%) and pathologic-T (12%) (4). The data of this study suggest that there is no correlation between the number or duration of preoperative ST-depression and the intraoperative course (fig. 2). The probability of predicting intraoperative ischemic events based on preoperative manifestations, however, is markedly increased, if more variables of preoperative ischemia (fig.1), such as ST↓ + ST↑ + pathologic-T + arrhythmias + symptomatic attacks are included.

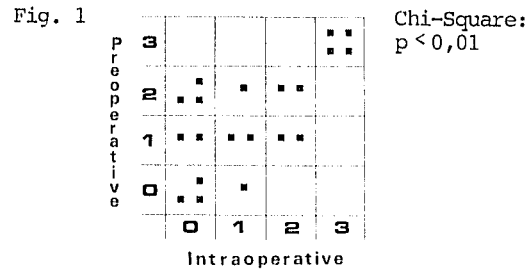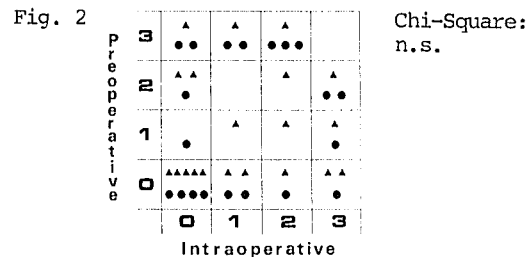

**References.**

1. Knight A.A. et al: Perioperative myocardial ischemia: are anesthesia and surgery truly stressful to the ischemic heart? Anesthesiology 67:A592, 1987
2. Metzler H. et al : Preoperative silent myocardial ischemia in patients with unstable angina. Anesthesiology 67:A3, 1987
3. Wilton N.C.T. et al: Silent pre-operative myocardial ischemia in surgical patients with ischemic heart disease. Anesthesiology 67:A591, 1987
4. Nademanee K. et al: Characteristics and clinical significance of silent myocardial ischemia in unstable angina. Am J Cardiol 58:26B-33B, 1986
